# Supplementary material
Source: MDPI journal article supplement (https://www.mdpi.com/2504-477X/5/10/253)
Supplement: s1 [file s1]

# Supplementary Materials: The Use of Agricultural Waste in the Modification of Poly(lactic acid)-Based Composites Intended for 3D Printing Applications. The Use of Toughened Blend Systems to Improve Mechanical Properties

Jacek Andrzejewski, Karolina Grad, Wojciech Wiśniewski and Joanna Szulc

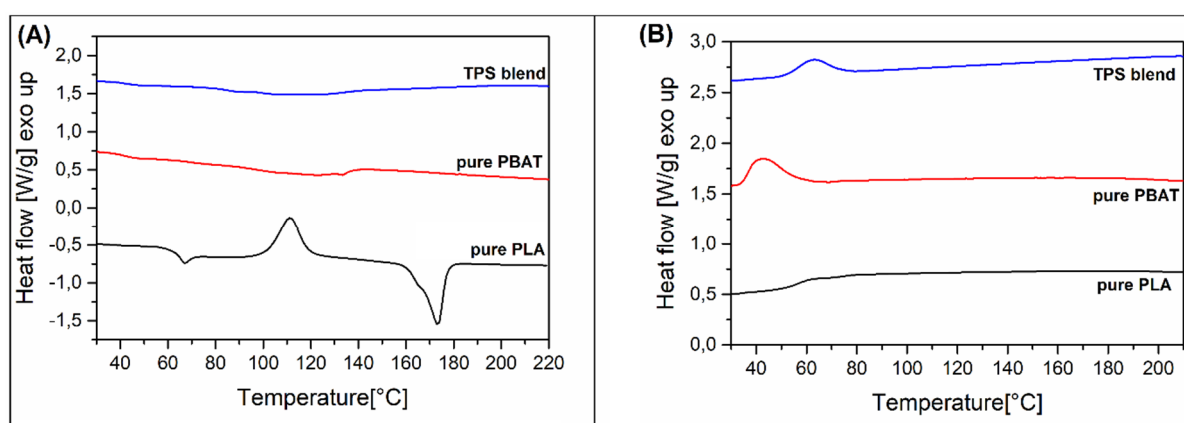

**Figure S1.** The DSC thermograms of the raw materials: pure PLA, pure PBAT, and TPS blend. (A) 1<sup>st</sup> heating, and (B) cooling plots.

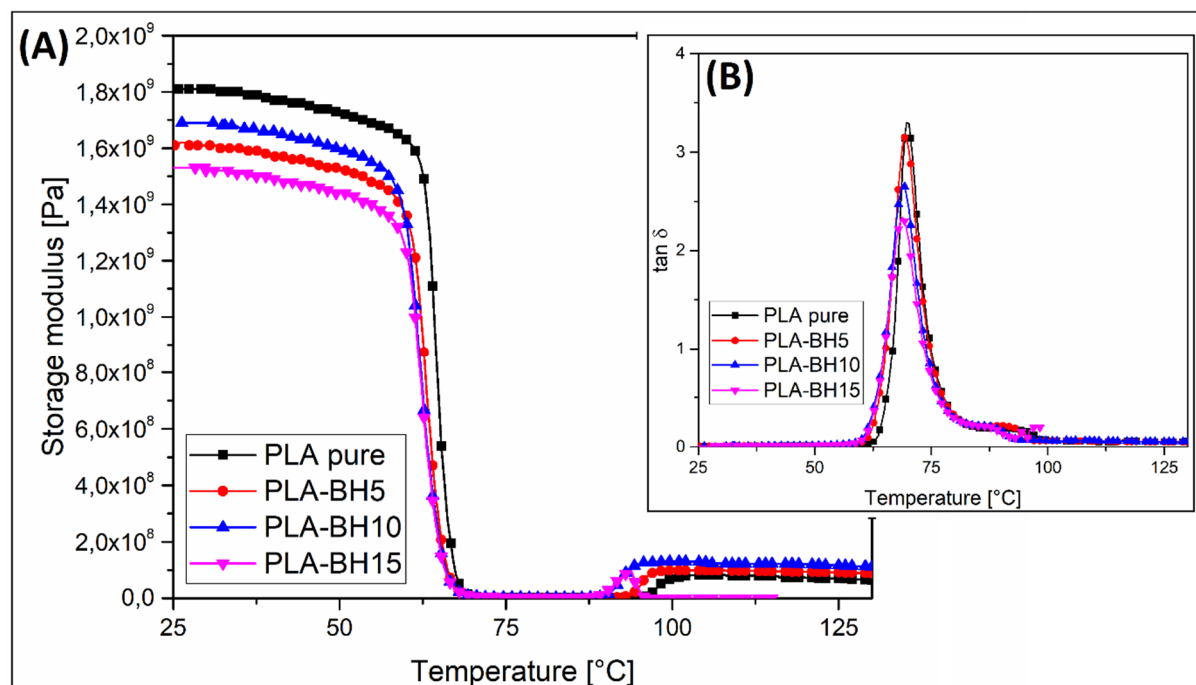

**Figure S2.** The results of the DMTA analysis for unmodified PLA/BH composites. (A) storage modulus thermograms, and (B) tan  $\delta$ .

**Table S1.** The full table presenting the results of tensile and flexural tests results and notched Charpy impact test results.

|                                 | Tensile test |             |                     | Flexural test |              | Charpy test          |
|---------------------------------|--------------|-------------|---------------------|---------------|--------------|----------------------|
|                                 | Modulus      | Strength    | Elongation at break | Modulus       | Strength     | Impact strength      |
|                                 | [MPa]        | [MPa]       | [%]                 | [MPa]         | [MPa]        | [kJ/m <sup>2</sup> ] |
| <b>Injection-molded samples</b> |              |             |                     |               |              |                      |
| PLA                             | 2880 (±124)  | 62.7 (±0.1) | 3.1 (±0.2)          | 3970 (±31)    | 117.0 (±0.6) | 2.5 (±0.1)           |
| PLA/PBAT10                      | 2890 (±41)   | 57.6 (±1.5) | 52.6 (±13.4)        | 3490 (±103)   | 95.1 (±1.3)  | 2.5 (±0.3)           |
| PLA/PBAT20                      | 2520 (±40)   | 47.5 (±1.6) | 200.0 (±42.0)       | 3100 (±13)    | 82.9 (±0.9)  | 4.1 (±0.8)           |
| PLA/PBAT30                      | 2110 (±51)   | 38.4 (±0.5) | 140.0 (±31.0)       | 2640 (±117)   | 69.1 (±1.4)  | 8.9 (±1.1)           |
| PLA/PBAT30/CE                   | 2190 (±11)   | 41.3 (±0.1) | 51.3 (±18.4)        | 2160 (±63)    | 67.1 (±2.0)  | 11.2 (±0.9)          |
| PLA/TPS10                       | 3090 (±9)    | 57.1 (±0.6) | 8.1 (±3.4)          | 3470 (±81)    | 95.1 (±3.7)  | 3.3 (±0.3)           |
| PLA/TPS20                       | 2700 (±55)   | 45.9 (±3.9) | 22.5 (±4.9)         | 3175 (±72)    | 80.8 (±2.9)  | 5.6 (±0.6)           |
| PLA/TPS30                       | 2470 (±17)   | 42.4 (±0.4) | 72.0 (±17.9)        | 3136 (±107)   | 76.4 (±2.1)  | 5.9 (±0.8)           |
| PLA/TPS30/CE                    | 2510 (±28)   | 45.7 (±0.4) | 53.0 (±21.0)        | 2580 (±59)    | 76.7 (±1.0)  | 5.1 (±0.6)           |
| <b>FDM printed samples</b>      |              |             |                     |               |              |                      |
| PLA                             | 3100 (±14)   | 52.2 (±0.1) | 2.6 (±0.1)          | 2920 (±37)    | 77.2 (±1.7)  | 2.1 (±0.3)           |
| PLA/PBAT30                      | 1900 (±63)   | 31.4 (±2.1) | 10.6 (±0.4)         | 1960 (±184)   | 57.7 (±5.8)  | 9.8 (±1.9)           |
| PLA/PBAT30/CE                   | 1820 (±54)   | 30.1 (±1.5) | 17.6 (±4.1)         | 2000 (±42)    | 54.7 (±1.2)  | 8.4 (±0.23)          |
| PLA/TPS30                       | 2200 (±86)   | 36.7 (±2.3) | 3.2 (±0.3)          | 2170 (±78)    | 58.7 (±3.5)  | 5.1 (±0.8)           |
| PLA/TPS30/CE                    | 2350 (±195)  | 36.3 (±3.2) | 3.4 (±0.6)          | 2257 (±45)    | 64.9 (±2.9)  | 4.6 (±1.0)           |
| PLA-BH5                         | 2880 (±73)   | 44.8 (±0.6) | 2.8 (±0.1)          | 3200 (±88)    | 84.2 (±2.4)  | 2.5 (±0.4)           |
| PLA-BH10                        | 2850 (±43)   | 40.9 (±1.1) | 2.1 (±0.1)          | 2850 (±64)    | 75.9 (±3.0)  | 1.4 (±0.6)           |
| PLA-BH15                        | 2640 (±148)  | 32.8 (±2.3) | 2.3 (±0.1)          | 3310 (±87)    | 67.4 (±3.1)  | 1.9 (±0.3)           |
| PLA/PBAT30/CE-BH10              | 2390 (±33)   | 38.0 (±0.7) | 3.4 (±0.2)          | 2250 (±449)   | 65.3 (±7.5)  | 4.2 (±0.3)           |
| PLA/TPS30/CE-BH10               | 1810 (±49)   | 30.0 (±0.7) | 5.2 (±0.7)          | 2170 (±39)    | 60.8 (±0.6)  | 4.8 (±0.6)           |

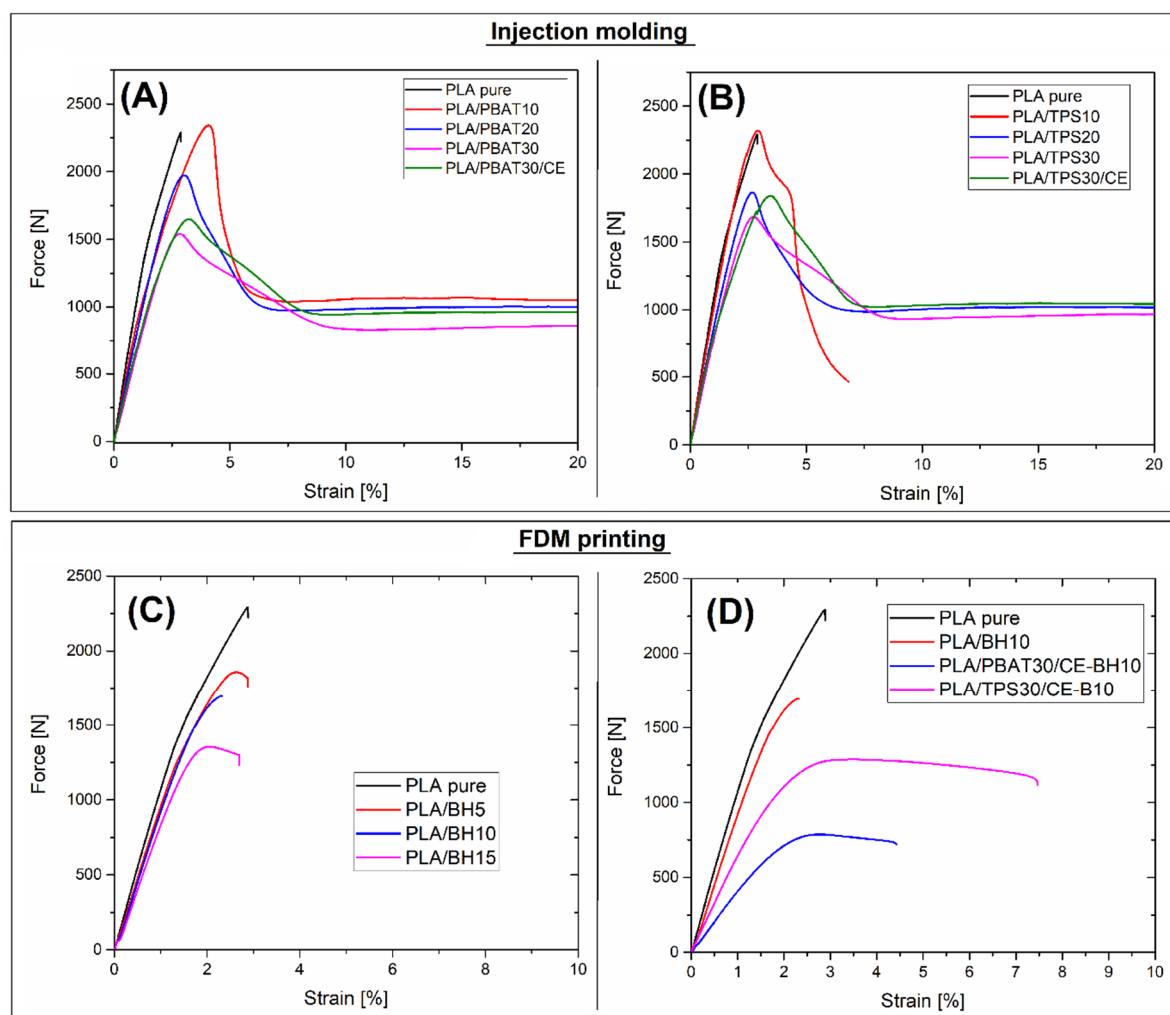**Figure S3.** The tensile test plots for (A, B) injection molded samples and (C, D) FDM printed materials.
